# Supplementary material
Source: ML conference proceedings conference paper supplement (https://openaccess.thecvf.com/content/cvpr_2017/html/Moosavi-Dezfooli_Universal_Adversarial_Perturbations_2017_CVPR_paper.html)
Supplement: Supplementary file 1 [file Moosavi-Dezfooli_Universal_Adversarial_Perturbations_2017_CVPR_supplemental.pdf]

# Universal adversarial perturbations

Seyed-Mohsen Moosavi-Dezfooli<sup>\*†</sup>

seyed.moosavi@epfl.ch

Omar Fawzi<sup>‡</sup>

omar.fawzi@ens-lyon.fr

Alhussein Fawzi<sup>\*†</sup>

alhussein.fawzi@epfl.ch

Pascal Frossard<sup>†</sup>

pascal.frossard@epfl.ch

---

<sup>\*</sup>The first two authors contributed equally to this work.

<sup>†</sup>École Polytechnique Fédérale de Lausanne, Switzerland

<sup>‡</sup>ENS de Lyon, LIP, UMR 5668 ENS Lyon - CNRS - UCBL - INRIA,  
Université de Lyon, France

## A. Appendix

Fig. A.1 shows the original images corresponding to the experiment in Fig. 3. Fig. A.2 visualizes the graph showing relations between original and perturbed labels (see Section 3 for more details).

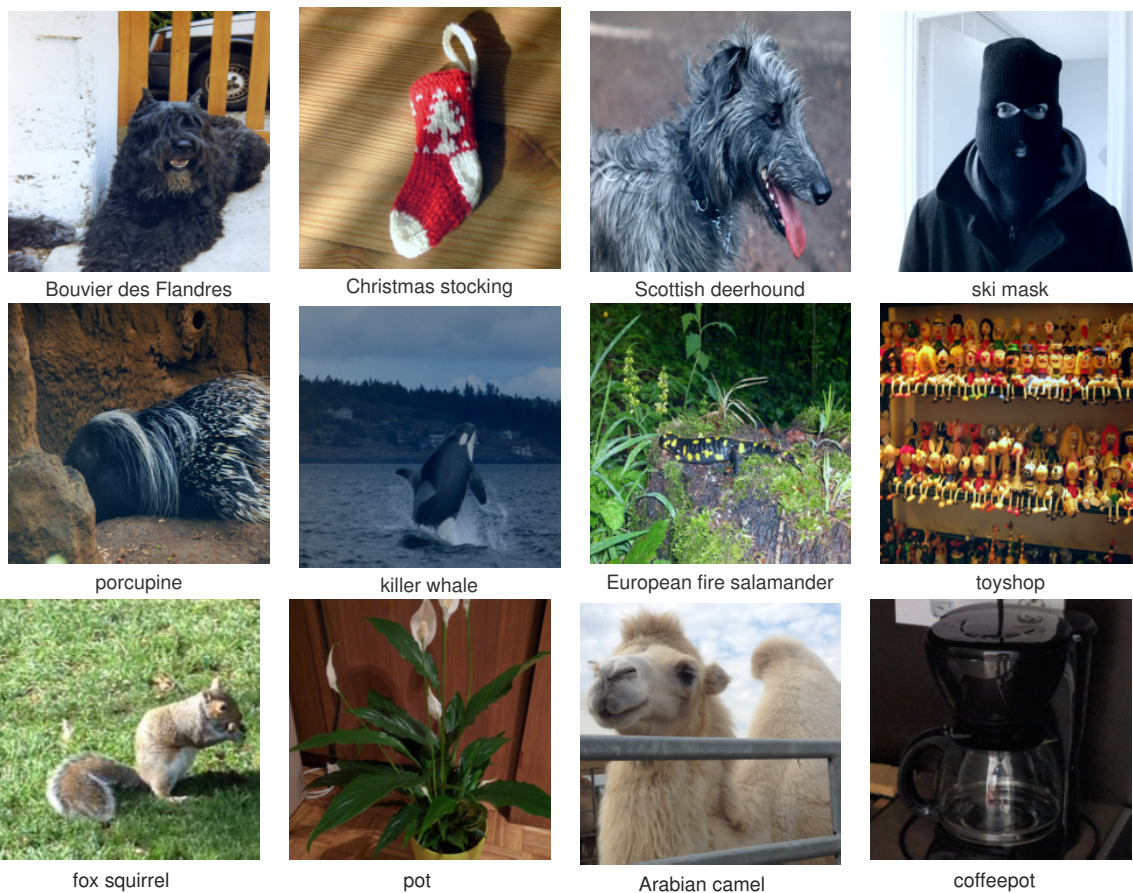

Figure A.1: Original images. The first two rows are randomly chosen images from the validation set, and the last row of images are personal images taken from a mobile phone camera.

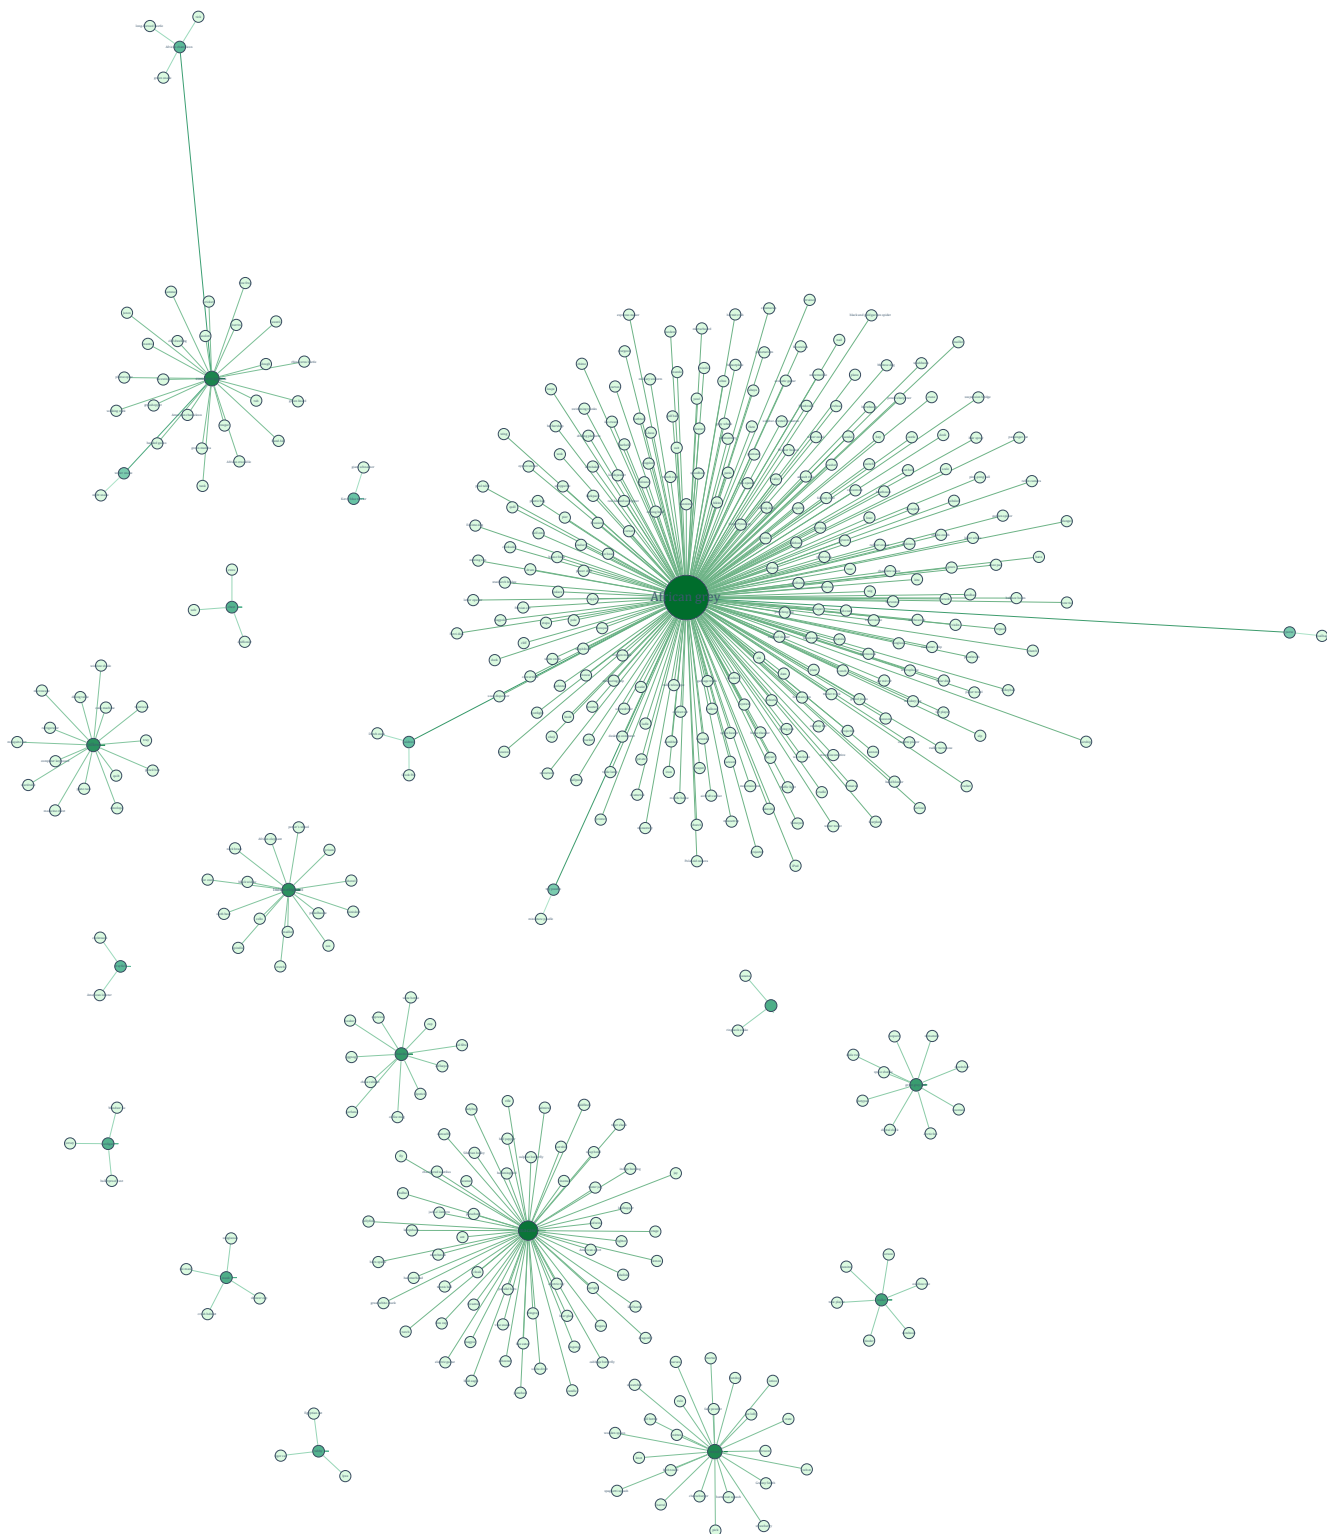

Figure A.2: Graph representing the relation between original and perturbed labels. Note that “dominant labels” appear systematically. Please zoom for readability. Isolated nodes are removed from this visualization for readability.
